# Supplementary material
Source: publisher site journal article supplement (https://neobiota.pensoft.net/article/51522/download/suppl/31/)
Supplement: Supplementary file 1

***Supplementary Text 1: Original (German) version of the survey text.***

## Zielgruppen

### Ich verfolge derzeit eine Ausbildung bzw. arbeite im Bereich…

- Ökologie / Umweltschutz / Naturschutz / Schutzgebiete
- Landwirtschaft / Forstwirtschaft
- Gartenbau / Landschaftsplanung
- Jagd / Fischerei
- Keine der oben genannten Optionen zutreffend

Erläuterung: Bitte wählen Sie die für Sie zutreffendste Kategorie aus.

## Bewertung und Wahrnehmung

„Sie sehen nun beschriftete Bilder von je einer Pflanzen- oder Tierart, die in Österreich verbreitet ist. Darunter finden Sie Aussagen zur jeweiligen Art. Bitte kreuzen Sie unter jeder Aussage jenen Punkt an, der Ihrem **persönlichen Empfinden** und **Ihrer Wahrnehmung** gegenüber dieser Art am ehesten entspricht. Es gibt weder richtig noch falsch, Ihr "Bauchgefühl" zählt.“

[Bild heimische Art] [Bild nicht heimische Art]

| Ihre Funktion in unseren Ökosystemen ist… | …wichtig | o o o o o | …unwichtig |
| --- | --- | --- | --- |
| Beeinflusst unsere Ökosysteme… | …positiv | o o o o o | …negativ |
| Löst bei mir … Emotionen aus. | positive | o o o o o | negative |
| Wirkt optisch… | …ansprechend bzw. schön | o o o o o | …unansprechend bzw. hässlich |
| Sollte … geschützt werden. | besser/mehr | o o o o o | weniger/nicht |
| Gehört in unser Landschaftsbild. | Sehr | o o o o o | Gar nicht |
| Ich kenne diese Art… | …sehr gut | o o o o o | …gar nicht |

## Akzeptanz

„Hier sehen Sie nochmals die vorhin gezeigten Tier- und Pflanzenarten. Bitte beantworten Sie die Frage in Bezug auf Ihre persönliche Meinung und Akzeptanz. Die technische Durchführbarkeit ist hier nicht von Belang.“

[Bild heimische Art] [Bild nicht heimische Art]

Welche der folgenden Managementmaßnahmen² würden Sie persönlich akzeptieren, um nötigenfalls ihre Ausbreitung einzuschränken bzw. zu unterbinden?

| **Tiere** | **Pflanzen** |
| --- | --- |
| Fang und artgerechte Tötung | Ausgraben und Vernichtung |
| Abschuss | Rodung |
| Beseitigung/Entfernung ohne Tötung | Beseitigung/Entfernung ohne Abtötung |
| Verhinderung weiterer Ausbreitung (z.B. Errichtung von Quarantänezonen um Befallsgebiete) | Verhinderung weiterer Ausbreitung (z.B. Errichtung von Quarantänezonen um Befallsgebiete) |
| Tötung durch chemische Mittel | Abtötung durch chemische Mittel |
| Einsatz von natürlichen Feinden | Einsatz von natürlichen Feinden |
| Tötung durch Infektion mit artspezifischen Krankheiten | Abtötung durch Infektion mit artspezifischen Krankheiten oder Pilzkrankheiten |
| Verbot der Haltung und des Handels | Verbot der Haltung und des Handels |
| Verbot der Freisetzung in die Umwelt | Verbot der Freisetzung in die Umwelt |
| Einfuhrkontrollen; Verbot der Einfuhr | Einfuhrkontrollen; Verbot der Einfuhr |

Optionen: Sehr akzeptabel, ziemlich akzeptabel, wenig akzeptabel, nicht akzeptabel

² Management bedeutet, dass durch gesetzte Maßnahmen die weitere Verbreitung und Vermehrung der Art eingeschränkt oder ausgeschlossen wird bzw. sie unter Beobachtung gestellt werden.

### Gibt es eine weitere Option, die sie akzeptieren würden?

[Feld zum Eintragen]

## Kenntnis heimische / nicht-heimische Arten

### Hier sehen Sie nochmals die vorhin gezeigten Tier- und Pflanzenarten. Welche dieser Arten sind Ihrer Meinung nach in Österreich heimisch und welche sind erst mithilfe des Menschen als Neobiota² nach Österreich gelangt?

[Bild]

5-stufige Skala: 1 = sicher in Österreich heimisch; 3 = ich weiß es nicht; 5 = sicher Neobiot in Österreich

² Als Neobiota werden Pflanzen-, Tier-, oder Pilzarten verstanden, die in einem bestimmten Gebiet (z.B. Österreich) nicht einheimisch sind und die erst nach 1492 unter Mithilfe des Menschen in dieses Gebiet gelangt sind und dort wild leben.

## Bedeutung des Themas

### Für wie relevant halten Sie Neobiota² und deren Management³ für Österreich?

5-stufige Skala: Sehr wichtig o o o o o Nicht wichtig

² Als Neobiota werden Pflanzen-, Tier-, oder Pilzarten verstanden, die in einem bestimmten Gebiet (z.B. Österreich) nicht einheimisch sind und erst nach 1492 unter Mithilfe des Menschen in dieses Gebiet gelangt sind und dort wild leben. Unter Umständen können diese dann eine Bedrohung für die heimische Artenvielfalt darstellen. Siehe: <http://www.neobiota-austria.at/ms/neobiota-austria/neobiota_definition/>

³ Management bedeutet, dass durch gesetzte Maßnahmen die weitere Verbreitung und Vermehrung der Neobiota eingeschränkt oder ausgeschlossen wird bzw. sie unter Beobachtung gestellt werden.

### Wie schätzen Sie den Beitrag folgender Organisationen / Berufsgruppen zum Management² biodiversitätsgefährdender Neobiota³ in Österreich ein?

- Schutzgebietsverwaltungen
- NGOs für Umwelt-, Natur-, oder Artenschutz
- Land- und Forstwirte
- Gärtner*innen
- Jäger*innen
- Landschaftsplaner*innen
- Bundesregierung
- Landesregierungen
- Europäische Union

5-stufige Skala: 1 = kein Beitrag; 5 = leistet hohen Beitrag

² Management bedeutet, dass durch gesetzte Maßnahmen die weitere Verbreitung und Vermehrung der Neobiota eingeschränkt oder ausgeschlossen wird bzw. sie unter Beobachtung gestellt werden.

³ Als biodiversitätsgefährdend bzw. invasiv gelten Neobiota, die in zumindest einem Biotoptyp so häufig vorkommen, dass eine Verdrängung heimischer Arten belegt oder zu vermuten ist. Siehe: <http://www.neobiota-austria.at/ms/neobiota-austria/neobiota_definition/>

## EU-Verordnung

### Wie wichtig ist Ihrer Meinung nach die Regelung zur Prävention und Management von biodiversitätsgefährdenden Neobiota durch eine EU-Verordnung?

5-stufige Skala: 1 = Sehr wichtig; 5 = Nicht wichtig

### Hier sehen Sie Aussagen zur EU-Verordnung über biodiversitätsgefährdende Neobiota. Bitte kreuzen Sie an, ob Sie zustimmen oder wiedersprechen.

- Neobiota betreffen Natur und Arten in ganz Europa
- Gemeinsam koordiniertes, EU-weites Vorgehen ist von Vorteil
- Jedes Land sollte allein über diese Thematik entscheiden
- Die EU als ein einziger großer Anwendungsbereich ist effektiver
- Einheitlicher EU-Maßnahmenkatalog ist effizienter
- Neobiota stellen in manchen EU-Ländern keine Bedrohung dar
- Kontrollvorteile durch Zollunion und Schengengrenze

3-stufige Skala: widerspreche; neutral; stimme zu

### Die Verordnung Nr. 1143/2014 des Europäischen Parlaments und des Rates über die Prävention und das Management der Einbringung und Ausbreitung invasiver gebietsfremder Arten (Neobiota)² war mir bisher schon bekannt.

Ja/Nein/keine Angabe

²Siehe auch: https://eur-lex.europa.eu/legal-content/DE/TXT/?uri=CELEX%3A32014R1143

# Demographie

### Geschlecht

- Weiblich
- Männlich
- Anderes
- Keine Angabe

### Alter

- bis 19
- 20 - 29
- 30 - 39
- 40 - 49
- 50 - 59
- ab 60
- keine Angabe

### Einwohnerzahl ihrer Wohngemeinde

- Unter 1000 Einwohner*innen
- 1000 bis 10.000 Einwohner*innen
- 10.000 bis 30.000 Einwohner*innen
- 30.000 bis 100.000 Einwohner*innen
- 100.000 bis 1 Mio. Einwohner*innen
- Über 1 Mio. Einwohner*innen
- keine Angabe

### Herkunftsland:

- Österreich
- Sonstiger EU-Staat
- Nicht-EU-Staat in Europa
- Sonstiges
- Keine Angabe

### Höchste abgeschlossene Ausbildung

- Pflichtschule
- Lehre
- Facharbeiter / Fachschule
- Matura
- Bachelor
- Master / Magister
- PhD / Doktorat
- Sonstige
- keine Angabe

***Supplementary Text 2: Translated English version of the survey text.***

**Target Group**

### Currently I’m working in the field of/getting an education in …

- Ecology / Environmental protection / Nature protection / Natural reserves
- Agriculture / Forestry
- Landscape architecture / Gardening
- Hunting / Fishing
- None of the listed options

**Perception of species**

“You will be shown pictures of plant or animal species that are common in Austria. Below you will find statements about the respective species. Please tick the point that most closely matches your personal feelings and your perception of this species. There is neither right nor wrong, your "gut instinct" counts.”

[Picture native species] [Picture alien species]

| Their function in our ecosystem is… | very important | o o o o o | very unimportant |
| --- | --- | --- | --- |
| Affects our ecosystems… | very positively | o o o o o | very negatively |
| Triggers … emotions. | very positive | o o o o o | very negative |
| Appears visually... | very aesthetic | o o o o o | very non-aesthetic |
| Should be … protected. | much more | o o o o o | much less |
| Appertains to our landscape scenery. | Yes | o o o o o | No |
| I know this species… | very well | o o o o o | not |

**Perception of management methods**

“Here you can see the animal and plant species shown before. Please answer the question regarding your personal opinion and acceptance. The technical feasibility is not relevant.”

[Picture native species] [Picture alien species]

### Which of the following management methods would you accept to minimise/stop the dispersion of the species?

| **Mammals** | **Plants** |
| --- | --- |
| excavation and extermination | catch and appropriate killing |
| clearing | shooting |
| elimination/removal without killing | elimination/removal without killing |
| Prevention of further spread (e.g. establishment of quarantine zones around infested areas) | Prevention of further spread (e.g. establishment of quarantine zones around infested areas) |
| killing by chemical agents | killing by chemical agents |
| usage of natural enemies | usage of natural enemies |
| Killing by infection with species-specific diseases or fungal diseases | Killing by infection with species-specific diseases |
| prohibition of keeping and trading | prohibition of keeping and trading |
| prohibition of releasing into the environment | prohibition of releasing into the environment |
| import controls and bans | import controls and bans |

Options: Very acceptable, Rather acceptable, Slightly acceptable, Not acceptable

² Management means that taken measures restrict or prevent the further dispersion of the species or that they are monitored.

### Is there another option you would accept?

[please fill in an answer]

# Species knowledge

### Here you can see the animal and plant species shown before. In your opinion, which of these species are native to Austria and which have only arrived in Austria with the help of humans as neobiota²?

[Picture]

5-dotted scale: 1 = Certainly native in Austria, 2 = Presumably native in Austria, 3 = I don't know, 4 = Presumably not native in Austria, 5 = Certainly not native in Austria

² Neobiota are understood as plant, animal or fungal species that are not native to a particular area (such as Austria) and only arrived in this area after 1492 with the help of humans.

# Topic relevance

### Are the topics alien species² and their management³ relevant for Austria?

5-dotted scale: Very important o o o o o Not important

² Neobiota are understood as plant, animal or fungal species that are not native to a particular area (such as Austria) and only arrived in this area after 1492 with the help of humans. There is a possibility that they are a threat to native species. <http://www.neobiota-austria.at/ms/neobiota-austria/neobiota_definition/>

³ Management means that taken measures restrict or prevent the further dispersion of the species or that they are monitored.

### Please assess the contribution to Neobiota-actions of different organisations/professions.

- Management of natural reserves
- NGOs for conservation
- Farmers and Foresters
- Hunters
- EU
- Gardeners
- Landscape Architects
- Regional government
- Federal government

5-dotted-scale: 1 = No contribution, Little Contribution, Median contribution, High contribution, 5 = Very high contribution

# EU actions

How important are regulations for invasive alien species via EU-regulation?

5-dotted scale: Very important o o o o o Not important

### “Here you can see statements about the EU alien species actions. Please tick a box, depending on your agreement”

- Alien species concern nature and species all over Europe
- EU-coordinated actions are an advantage
- One EU action plan is more efficient
- Customs union and Schengen offer advantages
- The EU, as one big area for actions, is more efficient
- Every country should decide autonomously
- Alien species are not a threat in all EU countries

3-dotted-scale: Agree, No answer, Disagree

### Have you ever heard of Regulation (EU) 1143/2014 about prevention and management of Neobiota²?

Yes, No, No answer

²<https://eur-lex.europa.eu/legal-content/DE/TXT/?uri=CELEX%3A32014R1143>

# Demography

### Sex

- Female
- Male
- Different
- No answer

### Age

- up to 19
- 20 - 29
- 30 - 39
- 40 - 49
- 50 - 59
- 60 or older
- no answer

### Population of the hometown

- < 1000 Inhabitants
- 1000 to 10,000 inhabitants
- 10,000 to 100,000 inhabitants
- 100,000 to 1 mil. Inhabitants
- 1 mil. inhabitants
- no answer

### Home country:

- Austria
- EU
- non-EU country in Europe
- no answer

### Highest completed level of education

- Mandatory school
- Professional school/Skilled worker exam
- Apprenticeship
- Higher School Certificate
- Bachelor
- Master/Magister
- PhD/Doktorat
- Other
- no answer
